# Supplementary material for: Profiling Fusobacterium infection at high taxonomic resolution reveals lineage-specific correlations in colorectal cancer
Source: PubMed Central journal article supplement (PMC9184491; doi:10.1038/s41467-022-30957-6), 2022-06-09
Supplement: 41467_2022_30957_MOESM2_ESM.pdf [file 41467_2022_30957_MOESM2_ESM.pdf]

## **Description of Additional Supplementary Files**

File Name: Supplementary Data 1

Description: Bacterial genomes used in this study.

File Name: Supplementary Data 2

Description: ANIb values calculated in pairwise.

File Name: Supplementary Data 3

Description: FrpoB-seq results in the tissue and faecal samples.

File Name: Supplementary Data 4

Description: Pathological information of the patients with FrpoB-seq data available in tumour tissues.

File Name: Supplementary Data 5

Description: Pathological information of the patients and characteristics of health volunteers with FrpoB-seq data available in faecal samples.
